# Supplementary material
Source: PubMed Central journal article supplement (PMC7448602)
Supplement: advancesADV2020002198-suppl1.pdf [file advancesADV2020002198-suppl1.pdf]

**A**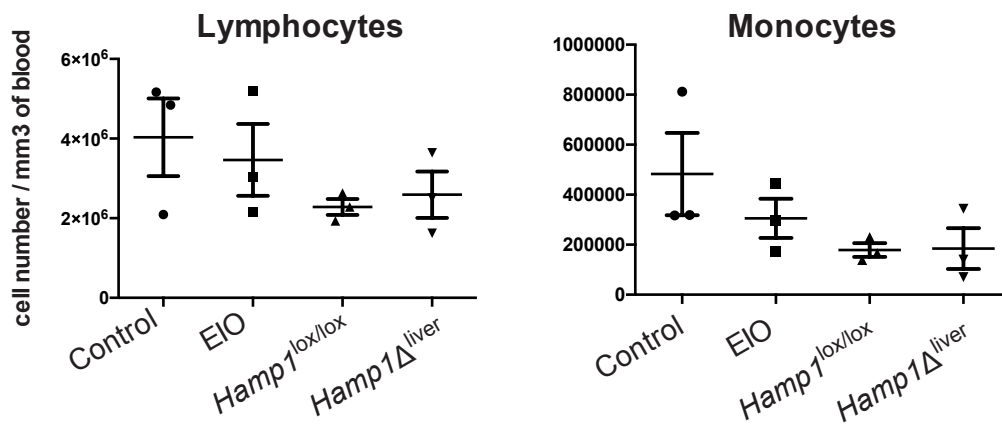**B**

**Oxidative burst - Opsonized Zymosan  
Iron supplementation**

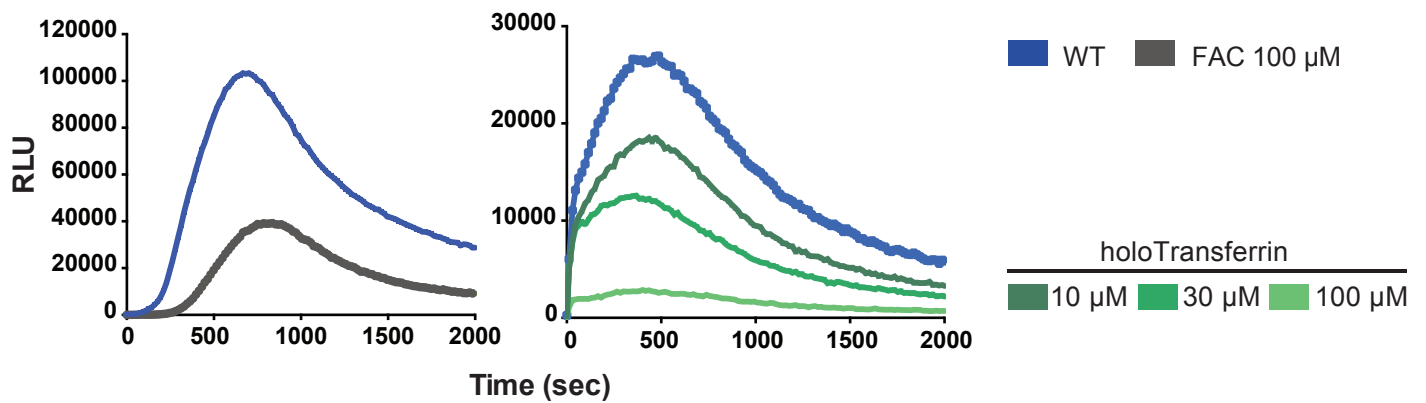**C**

**Oxidative burst - Opsonized Zymosan  
Iron supplementation  
Control without neutrophils**

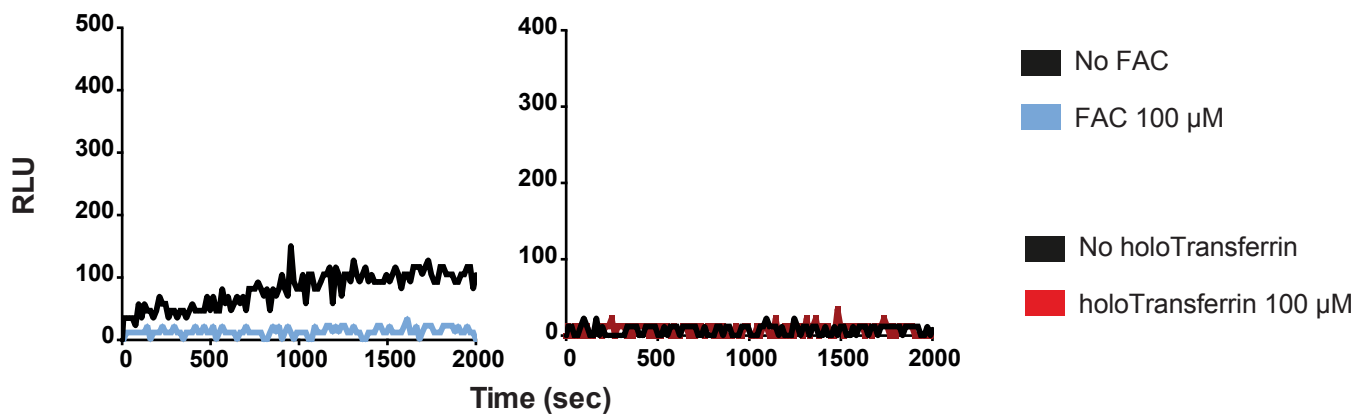

**Supplemental figure 1.** (A) White blood cell count in the EIO model vs control and *Hamp1* $\Delta$ <sup>liver</sup> vs *Hamp1*<sup>lox/lox</sup> mice. N=3 per group. (B) Representative experiment of the effect of iron supplementation on the neutrophil oxidative burst response to OZ. Neutrophils isolated from WT mice were resuspended in HBSS +/- holoTransferrin at 10, 30 or 100  $\mu$ M (Sigma) for 2 hours and the oxidative burst evaluated on a TriStar using  $1 \times 10^5$  cells. (C) In parallel, wells without neutrophils but with holoTf or FAC at the highest concentration were analyzed to evaluate the reaction of holoTf or FAC alone with luminol (and ZO).

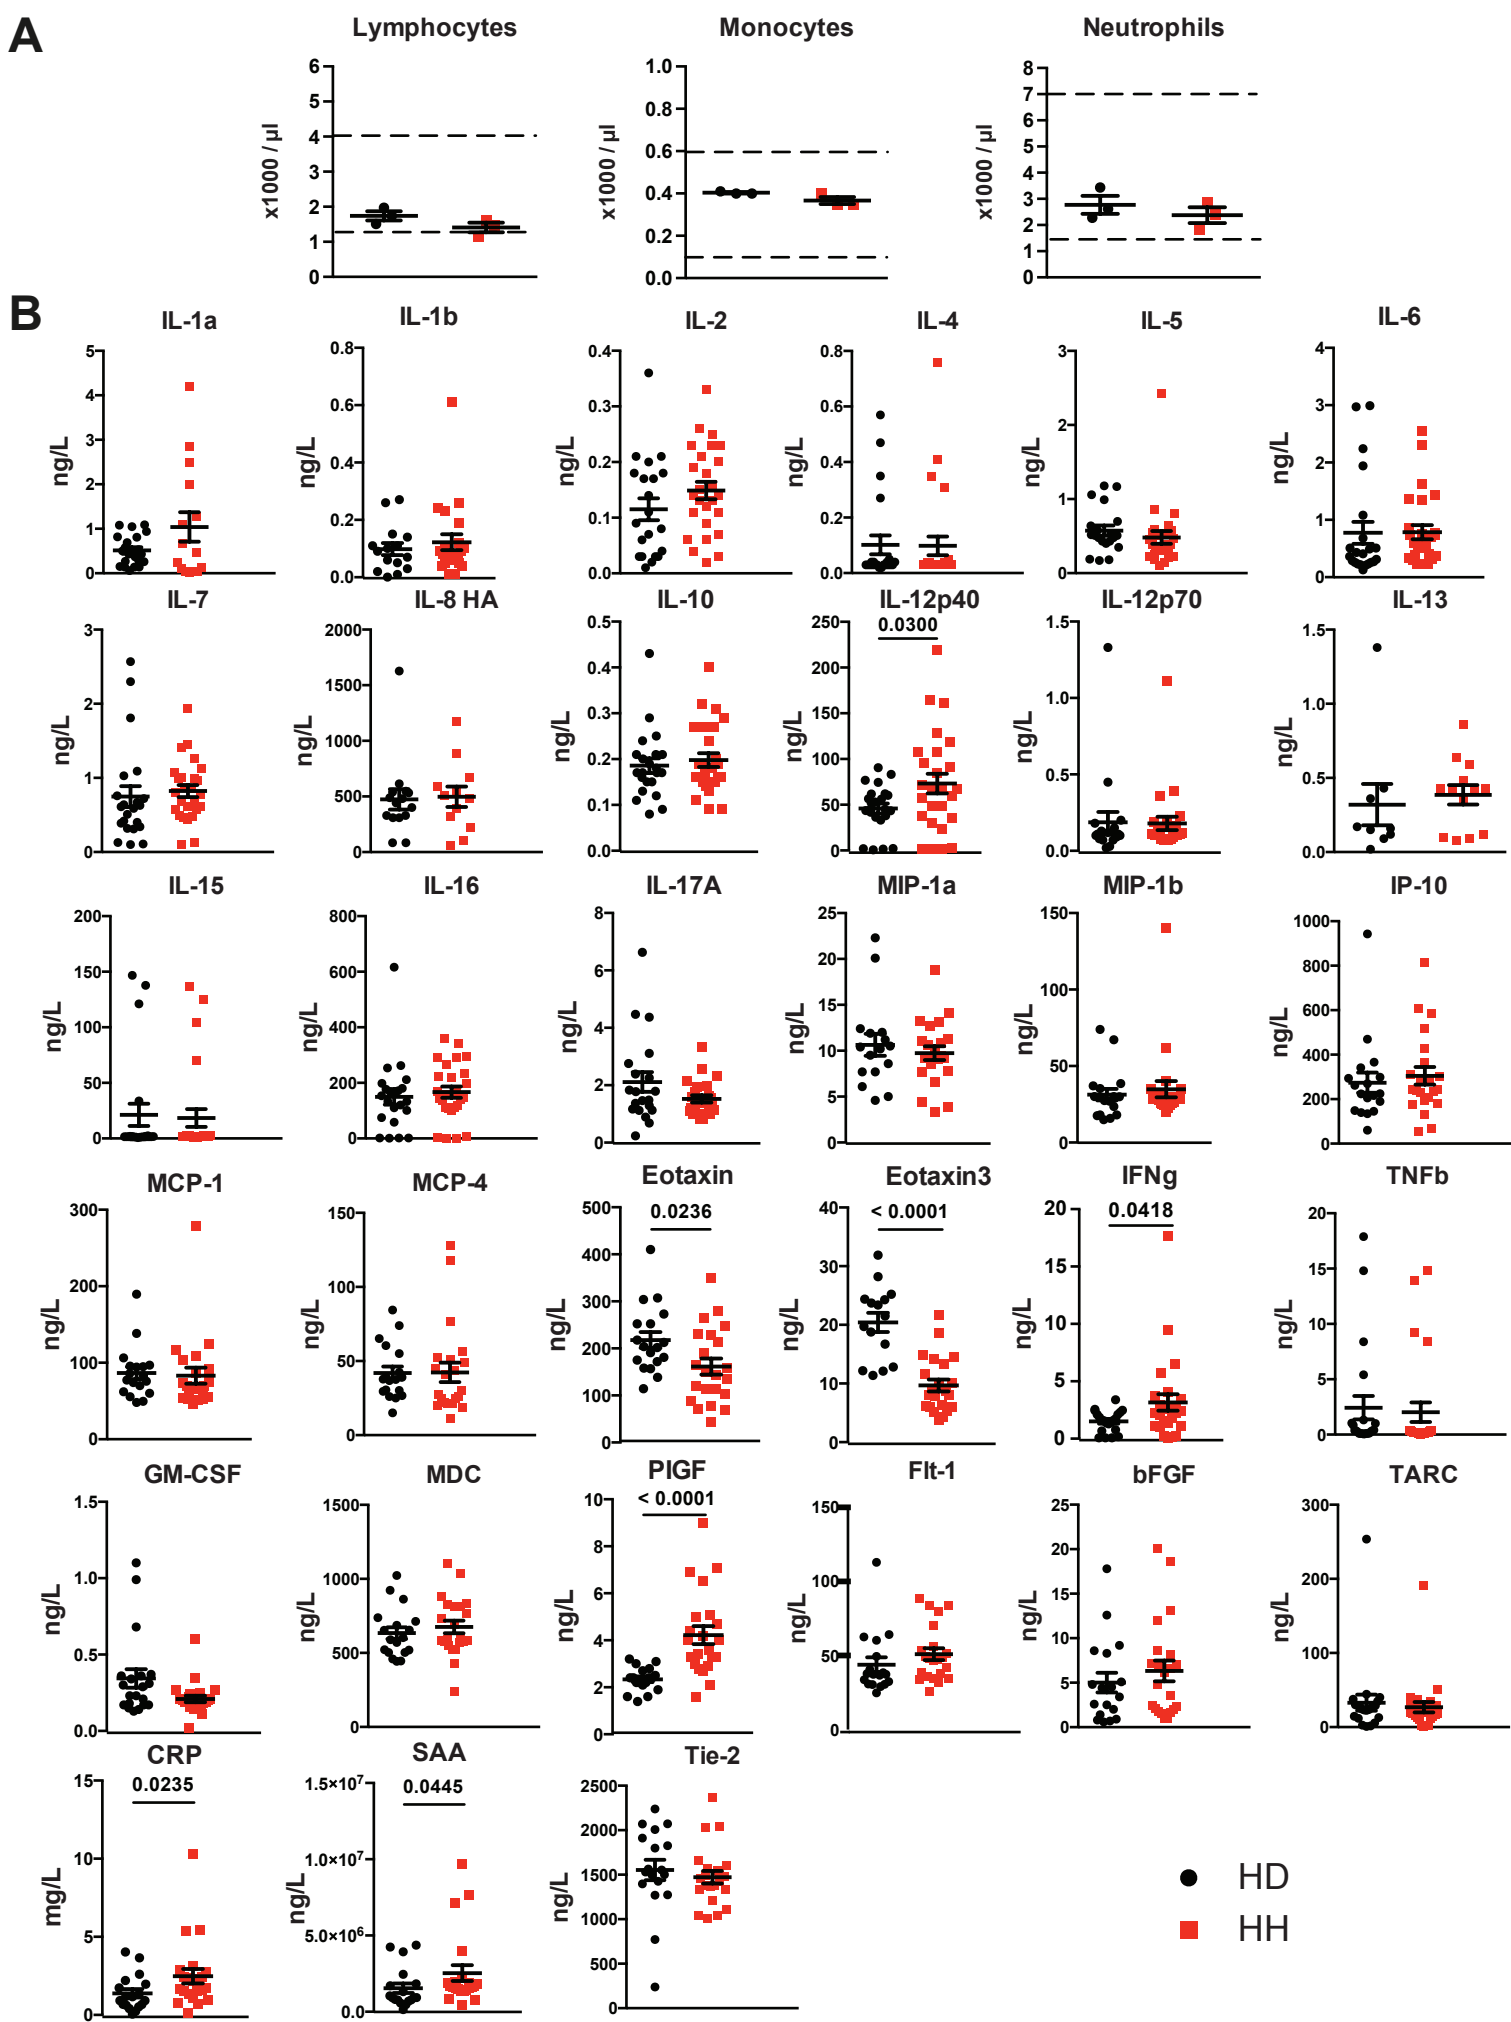

**Supplemental figure 2.** (A) White blood cell count in HH patients (red square) vs healthy donors (black dot). The discontinuous lines indicate the reference values for a healthy condition. N=3. (B) Panel of cytokines, chemokines and circulating factors detected in plasma of HH patients (red square) vs healthy donors (black dot). The normality of each data batch was assessed to determine the appropriate statistic test. All the results have been tested with an unpaired Mann-Whitney test except for MDC and IL-2 evaluated by unpaired t test. Healthy donors n=18; HH patients n=23.
